# Supplementary material for: Socioeconomic inequalities in risk factors for non communicable diseases in low-income and middle-income countries: results from the World Health Survey
Source: PubMed Central journal article supplement (PMC3507902; doi:10.1186/1471-2458-12-912), 2012-10-28
Supplement: 1471-2458-12-912-S1.pdf [file 1471-2458-12-912-S1.pdf]

Additional file 1. Study sample size, by country and sex, World Health Survey 2002-04

| <b>Middle-income countries</b> | <b>Total</b>   | <b>Men</b>    | <b>Women</b>  | <b>Low-income countries</b>      | <b>Total</b>  | <b>Men</b>    | <b>Women</b>  |
|--------------------------------|----------------|---------------|---------------|----------------------------------|---------------|---------------|---------------|
| Bosnia and Herzegovina         | 1,028          | 434           | 594           | Bangladesh                       | 5,550         | 2,584         | 2,966         |
| Brazil                         | 5,000          | 2,188         | 2,812         | Burkina Faso                     | 4,821         | 2,271         | 2,550         |
| China                          | 3,993          | 1,954         | 2,039         | Chad                             | 4,635         | 2,191         | 2,444         |
| Croatia                        | 990            | 401           | 589           | Comoros                          | 1,758         | 786           | 972           |
| Czech Republic                 | 935            | 419           | 516           | Congo                            | 2,487         | 1,164         | 1,323         |
| Dominican Republic             | 4,534          | 2,104         | 2,430         | Cote d'Ivoire                    | 3,178         | 1,815         | 1,363         |
| Ecuador                        | 4,608          | 2,043         | 2,565         | Ethiopia                         | 4,936         | 2,390         | 2,546         |
| Estonia                        | 1,011          | 367           | 644           | Ghana                            | 3,931         | 1,772         | 2,159         |
| Georgia                        | 2,749          | 1,162         | 1,587         | India                            | 9,723         | 4,705         | 5,018         |
| Hungary                        | 1,419          | 591           | 828           | Kenya                            | 4,346         | 1,847         | 2,499         |
| Kazakhstan                     | 4,496          | 1,544         | 2,952         | Lao People's Democratic Republic | 4,888         | 2,295         | 2,593         |
| Latvia                         | 855            | 286           | 569           | Malawi                           | 5,297         | 2,210         | 3,087         |
| Malaysia                       | 6,038          | 2,671         | 3,367         | Mali                             | 4,145         | 2,382         | 1,763         |
| Mauritius                      | 3,888          | 1,872         | 2,016         | Mauritania                       | 3,705         | 1,440         | 2,265         |
| Mexico                         | 38,617         | 16,327        | 22,290        | Myanmar                          | 5,886         | 2,551         | 3,335         |
| Morocco                        | 4,472          | 2,074         | 2,398         | Nepal                            | 8,686         | 3,698         | 4,988         |
| Namibia                        | 4,246          | 1,722         | 2,524         | Pakistan                         | 6,104         | 3,402         | 2,702         |
| Paraguay                       | 5,131          | 2,348         | 2,783         | Senegal                          | 2,970         | 1,548         | 1,422         |
| Philippines                    | 10,075         | 4,659         | 5,416         | Viet Nam                         | 3,491         | 1,571         | 1,920         |
| Russian Federation             | 4,422          | 1,593         | 2,829         | Zambia                           | 3,810         | 1,722         | 2,088         |
| Slovakia                       | 2,488          | 953           | 1,535         | Zimbabwe                         | 4,061         | 1,477         | 2,584         |
| South Africa                   | 2,351          | 1,115         | 1,236         |                                  |               |               |               |
| Sri Lanka                      | 6,698          | 3,117         | 3,581         |                                  |               |               |               |
| Swaziland                      | 3,061          | 1,397         | 1,664         |                                  |               |               |               |
| Tunisia                        | 5,068          | 2,343         | 2,725         |                                  |               |               |               |
| Ukraine                        | 2,498          | 883           | 1,615         |                                  |               |               |               |
| Uruguay                        | 2,977          | 1,447         | 1,530         |                                  |               |               |               |
| <b>Total</b>                   | <b>133,648</b> | <b>58,014</b> | <b>75,634</b> | <b>Total</b>                     | <b>98,408</b> | <b>45,821</b> | <b>52,587</b> |
