# Supplementary material for: Socioeconomic inequalities in risk factors for non communicable diseases in low-income and middle-income countries: results from the World Health Survey
Source: PubMed Central journal article supplement (PMC3507902; doi:10.1186/1471-2458-12-912), 2012-10-28
Supplement: 1471-2458-12-912-S2.pdf [file 1471-2458-12-912-S2.pdf]

Additional file 2. Non-response rates of risk factors for noncommunicable diseases, by country income group and sex, World Health Survey 2002-04

|              |                                    | Current daily smokers | Low-fruit/vegetable consumers <sup>a</sup> | Physically inactive people <sup>b</sup> | Heavy episodic alcohol drinkers <sup>c</sup> |
|--------------|------------------------------------|-----------------------|--------------------------------------------|-----------------------------------------|----------------------------------------------|
| <b>Men</b>   | <b>Middle-income country group</b> | 2.1                   | 8.7                                        | 4.6                                     | 2.8                                          |
|              | <b>Low-income country group</b>    | 1.5                   | 11.9                                       | 5.3                                     | 3.1                                          |
| <b>Women</b> | <b>Middle-income country group</b> | 2.1                   | 8.8                                        | 4.1                                     | 2.4                                          |
|              | <b>Low-income country group</b>    | 1.3                   | 10.6                                       | 4.8                                     | 1.9                                          |

All numbers are in percentage

<sup>a</sup> No data were available for Mexico

<sup>b</sup> No data were available for Morocco and Latvia

<sup>c</sup> Mauritania; and Bosnia-Herzegovina, Comoros, Mauritania and Pakistan were excluded from males and females datasets, respectively
